# Supplementary material for: Simulated Changes in Tropical Cyclone Size, Accumulated Cyclone Energy and Power Dissipation Index in a Warmer Climate
Source: MDPI journal article supplement (doi:10.3390/oceans2040039), 2021-10-11
Supplement: s1 [file s1]

## Article

# Simulated changes in tropical cyclone size, accumulated cyclone energy and power dissipation index in a warmer climate.

Michael Wehner

Lawrence Berkeley National Laboratory, Berkeley, California 94720 USA  
mfwehner@lbl.gov

## Supplemental tables

**Table S1.** Chavas radius (km) for wind speeds thresholds from the CAM5.1 preindustrial simulation (NATURAL) as a function of instantaneous Saffir-Simpson categorization.

|          | $r_0$ | $r_1$ | $r_2$ | $r_3$ | $r_4$ | $r_5$ |
|----------|-------|-------|-------|-------|-------|-------|
| Category |       |       |       |       |       |       |
| 1        | 80.3  | 31.4  | -     | -     | -     | -     |
| 2        | 102.0 | 40.8  | 27.6  | -     | -     | -     |
| 3        | 117.7 | 50.6  | 33.7  | 28.1  | -     | -     |
| 4        | 137.3 | 61.0  | 43.4  | 34.5  | 28.5  | -     |
| 5        | 167.3 | 76.2  | 54.7  | 45.5  | 36.0  | 27.7  |

**Table S2.** Chavas radius (km) for wind speeds thresholds from the CAM5.1 1.5°C above preindustrial simulation (HAPPI1.5) as a function of instantaneous Saffir-Simpson categorization. **Table S1.** Chavas radius (km) for wind speeds thresholds from the CAM5.1 preindustrial simulation (NATURAL) as a function of instantaneous Saffir-Simpson categorization.

|          | $r_0$ | $r_1$ | $r_2$ | $r_3$ | $r_4$ | $r_5$ |
|----------|-------|-------|-------|-------|-------|-------|
| Category |       |       |       |       |       |       |
| 1        | 81.7  | 32.0  | -     | -     | -     | -     |
| 2        | 102.9 | 41.3  | 28.1  | -     | -     | -     |
| 3        | 119.9 | 51.3  | 34.2  | 28.4  | -     | -     |
| 4        | 139.1 | 61.3  | 43.5  | 34.7  | 28.5  | -     |
| 5        | 168.3 | 75.0  | 53.6  | 44.5  | 35.2  | 26.9  |

Table S2. Chavas radius (km) for wind speeds thresholds from the CAM5.1 1.5°C above preindustrial simulation (HAPPI1.5) as a function of instantaneous Saffir-Simpson categorization.

**Table S3.** Chavas radius (km) for wind speeds thresholds from the CAM5.1 2°C above preindustrial simulation (HAPPI2.0) as a function of instantaneous Saffir-Simpson categorization.

|          | $r_0$ | $r_1$ | $r_2$ | $r_3$ | $r_4$ | $r_5$ |
|----------|-------|-------|-------|-------|-------|-------|
| Category |       |       |       |       |       |       |
| 1        | 81.0  | 32.0  | -     | -     | -     | -     |
| 2        | 102.5 | 41.2  | 27.7  | -     | -     | -     |
| 3        | 117.8 | 50.6  | 33.8  | 28.2  | -     | -     |
| 4        | 136.3 | 60.4  | 43.1  | 34.4  | 28.3  | -     |
| 5        | 168.0 | 75.6  | 54.1  | 44.8  | 35.4  | 28.8  |

Table S3. Chavas radius (km) for wind speeds thresholds from the CAM5.1 2°C above preindustrial simulation (HAPPI2.0) as a function of instantaneous Saffir-Simpson categorization.

**Table S4.** Chavas radius (km) for wind speeds thresholds from the CAM5.1 3°C above preindustrial simulation (UN-HAPPI3.0) as a function of instantaneous Saffir-Simpson categorization.

|          | <i>r0</i> | <i>r1</i> | <i>r2</i> | <i>r3</i> | <i>r4</i> | <i>r5</i> |
|----------|-----------|-----------|-----------|-----------|-----------|-----------|
| Category |           |           |           |           |           |           |
| 0        | 49.3      | -         | -         | -         | -         | -         |
| 1        | 79.5      | 31.7      | -         | -         | -         | -         |
| 2        | 103.1     | 41.4      | 27.9      | -         | -         | -         |
| 3        | 118.6     | 50.9      | 33.8      | 28.0      | -         | -         |
| 4        | 137.4     | 61.0      | 43.4      | 34.6      | 28.2      | -         |
| 5        | 160.5     | 73.2      | 52.7      | 43.8      | 34.7      | 27.5      |

Table S4. Chavas radius (km) for wind speeds thresholds from the CAM5.1 3°C above preindustrial simulation (UNHAPPI3.0) as a function of instantaneous Saffir-Simpson categorization.
